# Supplementary material
Source: PubMed Central journal article supplement (PMC6016471)
Supplement: supp_RA117.000975_133934_1_supp_113242_p6r927.pdf [file supp_RA117.000975_133934_1_supp_113242_p6r927.pdf]

# Supplementary material 1

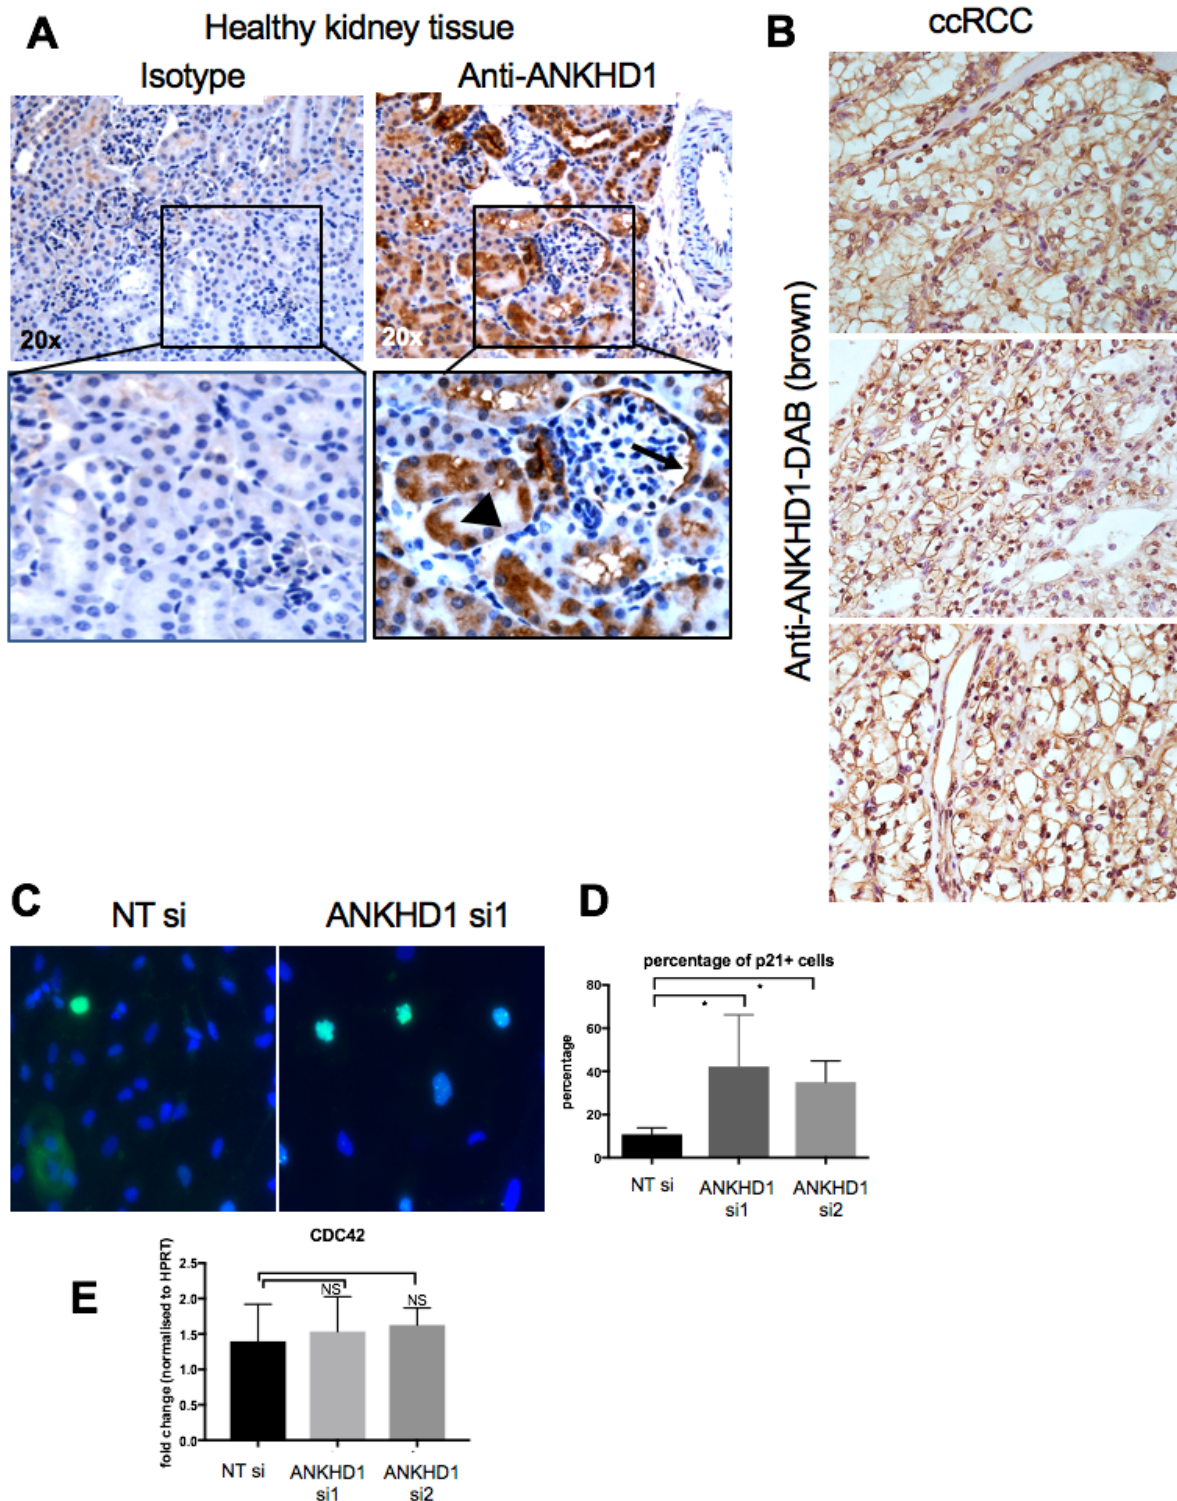

**SI Figure 1: A.** IHC of normal healthy kidney tissue was carried out and isotype control (left panel) was examined as well as anti-ANKHD1 (right panel). **B.** More examples of anti-ANKHD1 staining in RCC human tissues are shown, each vertical panel

represents a different RCC patient. **C.** Cells were stained by IF with anti-p21 antibody to study whether ANKHD1 silencing results in alterations of p21 as previously suggested in literature, p21 is in green and nuclei are counterstained in blue (dapi). **D.** Three independent experiments were performed and number of p21 positive cells were counted and shown as a percentage. Student t-test was carried out and p value of less than 0.05 was considered as significant. **E.** qPCR of one of the bioinformatics-identified target of miR-29a, CDC42, did not change significantly following knockdown of ANKHD1.

# Supplementary material 2

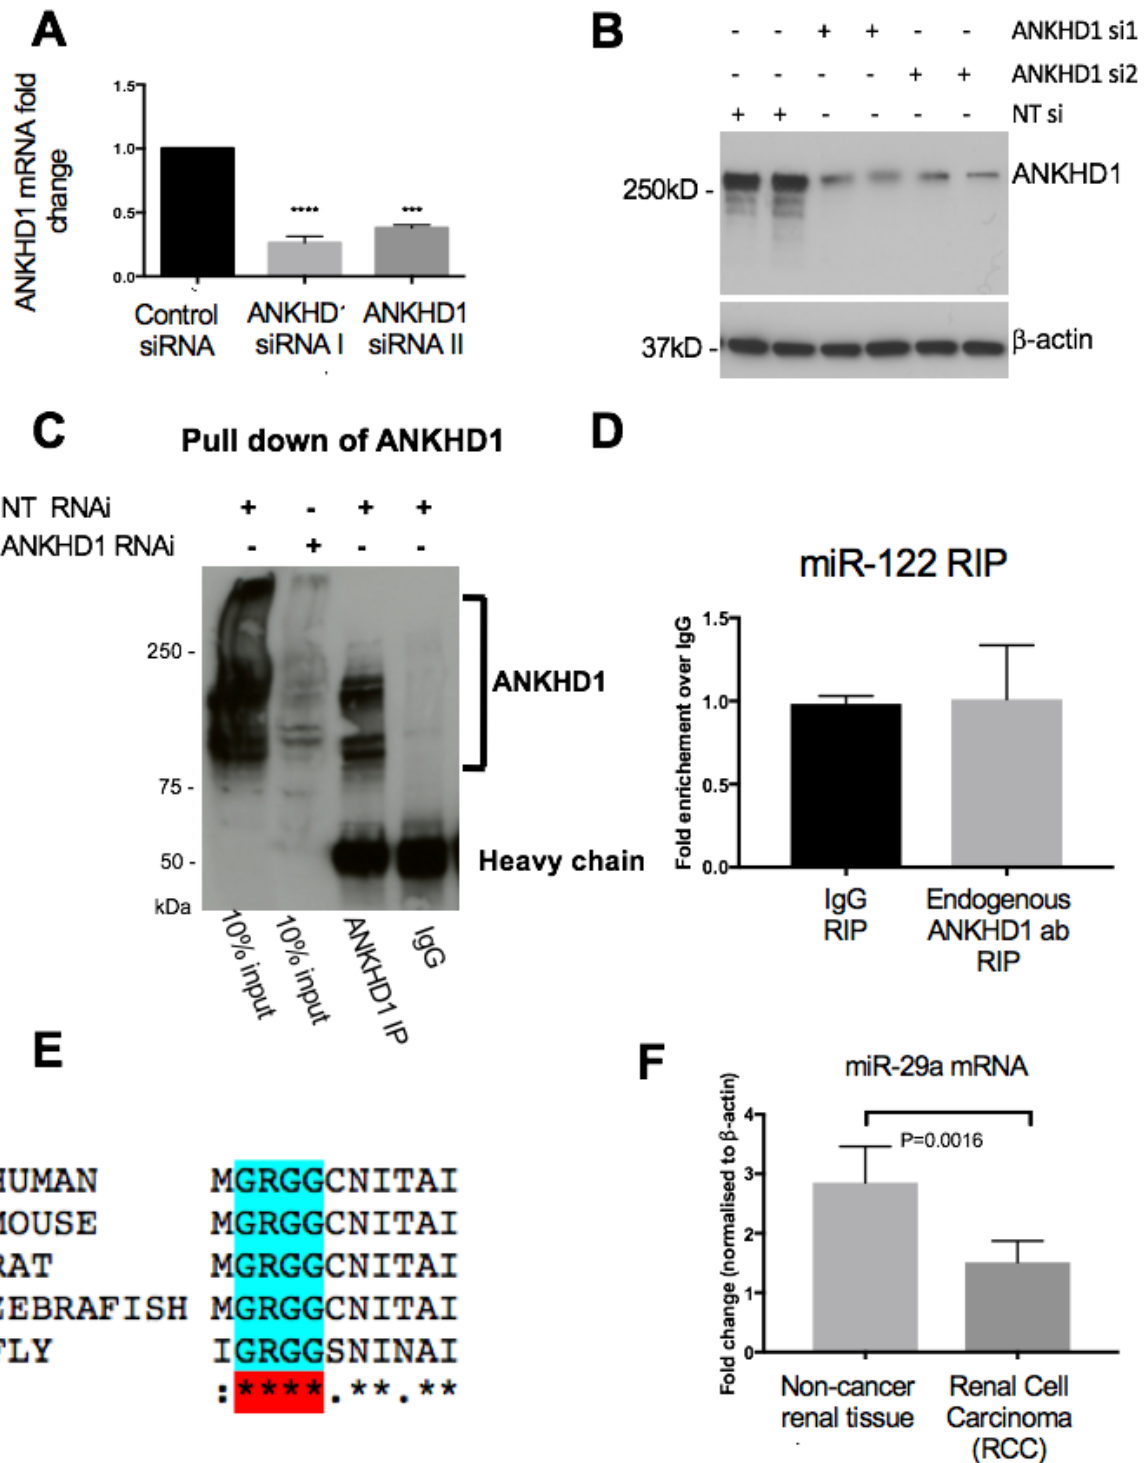

**SI Figure 2:** **A.** qPCR validation of the level of ANKHD1 knockdown following transfection with two independent siRNAs. **B.** Confirmation of the level of knockdown using Western blotting. **C.** The level of pull down used in RIP assays is assessed using Western blotting. **D.** RIP-qPCR of miR-122, one of the identified altered miRNAs, was

performed showing that it does not physically associate with ANKHD1. **E.** Actual amino acid homology of the GxxG box of ANKHD1 in human, mouse, rat, zebrafish and Drosophila is shown. **F.** qPCR analysis of miR-29a in RCC and healthy control tissues was carried out.

**Table 1**

| miRNA name | GO function                | Validated genes                                          | P value With Benjamini correction * | Validated by qPCR in this study                 |
|------------|----------------------------|----------------------------------------------------------|-------------------------------------|-------------------------------------------------|
| miR-29a-3p | Cell cycle control         | CDC42, CCND1, CCNT2, CDK2, CDK6, BCL2, VEGFA, KLF4, NASP | <b>4.70E-04</b><br><b>*1.40E-02</b> | VEGFA, KLF4, CCND1<br><br>(not validated CDC42) |
| miR-196a   | Cell cycle not-significant | None identified                                          |                                     | N/A                                             |
| miR-205    | Cell proliferation         | BCL2, E2F1, AR, VEGFA                                    | 4.50E-03<br><b>*0.3</b>             | VEGFA                                           |

**Table 1:** Bioinformatics analysis was performed to analyse the known (Experimentally validated) targets of miRNAs followed by classification into functional categories with emphasis on cell division/proliferation using David gene ontology database.
